# Supplementary material for: Structural insights into ketanserin salts with aliphatic acids and their physiochemical properties
Source: Royal Society of Chemistry journal article supplement (doi:10.1039/d4ce00738g), 2024-01-01
Supplement: d4ce00738g1.pdf [file d4ce00738g1.pdf]

[Type here]

## Supporting Information

### Structural insights of Ketanserin salts with aliphatic acids and their physiochemical properties

Gowtham Kenguva,<sup>a</sup> Smruti Rekha Rout,<sup>a</sup> Tabrez R. Shaikh <sup>b</sup>, Debjani Baidya <sup>b</sup>, Nikita Shelke <sup>b</sup>, Palash Sanphui,<sup>\*c</sup> Rambabu Dandela<sup>\*a</sup>

<sup>a</sup>Department of Industrial and Engineering Chemistry, Institute of Chemical Technology-Indian Oil Bhubaneswar Campus, Bhubaneswar, India. E-mail: [r.dandela@iocb.ictmumbai.edu.in](mailto:r.dandela@iocb.ictmumbai.edu.in),

<sup>b</sup>Organic Chemistry Division, CSIR-National Chemical Laboratory, Dr. Homi Bhabha Road, Pashan, Pune, Maharashtra, India

<sup>c</sup>Department of Chemistry, SRM Institute of Science and Technology, Kattankulathur, Chennai-603203, India. E-mail: [palashi@srmist.edu.in](mailto:palashi@srmist.edu.in),

| Contents                                                                                | Page no.     |
|-----------------------------------------------------------------------------------------|--------------|
| <b>Table S1:</b> Crystallographic table of KTS salts                                    | <b>02</b>    |
| <b>Table S2:</b> Hydrogen bond geometry of molecular adducts of KTS.                    | <b>03</b>    |
| <b>Table S3:</b> Hirshfeld Surface Analysis of all molecular adducts.                   | <b>04</b>    |
| <b>Figure S1:</b> ORTEP view of KTS salts in 50% thermal ellipsoids.                    | <b>05</b>    |
| <b>Figure S2.</b> PXRD analysis after solubility experiments in both pH 1.2 and pH 6.8. | <b>06</b>    |
| Solubility studies                                                                      | <b>07-08</b> |

[Type here]

| Parameters 2.367                                   | KTS.SA.H2O                                                                     | KTS.SA.2H2O                                                      | KTS.MA                                                           | KTS.FA                                                           |
|----------------------------------------------------|--------------------------------------------------------------------------------|------------------------------------------------------------------|------------------------------------------------------------------|------------------------------------------------------------------|
| Formula                                            | C <sub>22</sub> H <sub>23</sub> FN <sub>3</sub> O <sub>3</sub> :H <sub>3</sub> | C <sub>22</sub> H <sub>23</sub> FN <sub>3</sub> O <sub>3</sub> : | C <sub>22</sub> H <sub>22</sub> FN <sub>3</sub> O <sub>3</sub> : | C <sub>22</sub> H <sub>23</sub> FN <sub>3</sub> O <sub>3</sub> : |
|                                                    | N <sub>3</sub> S:H <sub>2</sub> O                                              | H <sub>2</sub> NO <sub>3</sub> S:2(H <sub>2</sub> O)             | C <sub>4</sub> H <sub>3</sub> O <sub>4</sub>                     | C <sub>4</sub> H <sub>3</sub> O <sub>4</sub>                     |
| <i>M<sub>r</sub></i>                               | 511.54                                                                         | 528.55                                                           | 510.49                                                           | 511.50                                                           |
| crystal shape                                      | Needle                                                                         | block                                                            | Block                                                            | Block                                                            |
| crystal colour                                     | Colourless                                                                     | colourless                                                       | Colourless                                                       | Colourless                                                       |
| crystal system                                     | Triclinic                                                                      | Triclinic                                                        | Monoclinic                                                       | Monoclinic                                                       |
| space group                                        | <i>P</i> <sup>-1</sup>                                                         | <i>P</i> <sup>-1</sup>                                           | <i>P</i> 2 <sub>1</sub> / <i>n</i>                               | <i>P</i> 2 <sub>1</sub> / <i>c</i>                               |
| <i>T</i> , K                                       | 100                                                                            | 301.00                                                           | 298(2)                                                           | 298(2)                                                           |
| λ(Mo-K <sub>α</sub> )/Å                            | 0.71073                                                                        | 0.71073                                                          | 0.71073                                                          | 0.71073                                                          |
| <i>a</i> /Å                                        | 8.554(3)                                                                       | 9.104(3)                                                         | 6.018(5)                                                         | 6.662(2)                                                         |
| <i>b</i> /Å                                        | 10.936(5)                                                                      | 10.937(4)                                                        | 31.707(2)                                                        | 21.965(1)                                                        |
| <i>c</i> /Å                                        | 12.526(5)                                                                      | 12.774(5)                                                        | 12.500(1)                                                        | 16.468(1)                                                        |
| <i>α</i> <sup>0</sup>                              | 85.91(2)                                                                       | 86.214(11)                                                       | 90                                                               | 90                                                               |
| <i>β</i> <sup>0</sup>                              | 76.418(19)                                                                     | 71.917(10)                                                       | 96.98(2)                                                         | 91.69(1)                                                         |
| <i>γ</i> <sup>0</sup>                              | 87.737(17)                                                                     | 82.894(12)                                                       | 90                                                               | 90                                                               |
| <i>V</i> /Å <sup>3</sup>                           | 1135.8(8)                                                                      | 1199.3(7)                                                        | 2368.0(3)                                                        | 2408.7(4)                                                        |
| <i>Z</i>                                           | 2                                                                              | 2                                                                | 4                                                                | 4                                                                |
| <i>D<sub>c</sub></i> / g cm <sup>-3</sup>          | 1.496                                                                          | 1.464                                                            | 1.432                                                            | 1.411                                                            |
| <i>μ</i> , mm <sup>-1</sup>                        | 0.204                                                                          | 0.199                                                            | 0.110                                                            | 0.108                                                            |
| 2θ range [°]                                       | 2.43-27.48                                                                     | 2.36-25                                                          | 2.53-26.40                                                       | 2.64-27.48                                                       |
| limiting indices                                   | -11 ≤ <i>h</i> ≤ 11                                                            | -10 ≤ <i>h</i> ≤ 10                                              | -7 ≤ <i>h</i> ≤ 7                                                | -8 ≤ <i>h</i> ≤ 8                                                |
|                                                    | -14 ≤ <i>k</i> ≤ 14                                                            | -12 ≤ <i>k</i> ≤ 12                                              | -39 ≤ <i>k</i> ≤ 39                                              | -28 ≤ <i>k</i> ≤ 28                                              |
|                                                    | -16 ≤ <i>l</i> ≤ 16                                                            | -15 ≤ <i>l</i> ≤ 15                                              | -15 ≤ <i>l</i> ≤ 15                                              | -21 ≤ <i>l</i> ≤ 21                                              |
| <i>F</i> (000)                                     | 538                                                                            | 556                                                              | 1068                                                             | 1072                                                             |
| total reflections                                  | 43374                                                                          | 18053                                                            | 40219                                                            | 49293                                                            |
| unique reflections                                 | 5194                                                                           | 4199                                                             | 4869                                                             | 5537                                                             |
| reflection at <i>I</i> >                           | 4102                                                                           | 2183                                                             | 2961                                                             | 3809                                                             |
| 2σ ( <i>I</i> )                                    |                                                                                |                                                                  |                                                                  |                                                                  |
| No. of parameters                                  | 333                                                                            | 356                                                              | 343                                                              | 339                                                              |
| <i>R</i> <sub>1</sub> , <i>I</i> > 2σ ( <i>I</i> ) | 0.045                                                                          | 0.090                                                            | 0.047                                                            | 0.053                                                            |
| <i>wR</i> <sub>2</sub> <i>I</i> > 2σ ( <i>I</i> )  | 0.109                                                                          | 0.264                                                            | 0.148                                                            | 0.115                                                            |
| GoF on <i>F</i> <sup>2</sup>                       | 1.051                                                                          | 1.061                                                            | 1.123                                                            | 1.062                                                            |
| CCDC Nos                                           | 2372349                                                                        | 2372347                                                          | 2372346                                                          | 2372345                                                          |

[Type here]

**Table S1.** Crystallographic lattice parameters of KTS salts

| Solid forms        | <i>D</i> –H··· <i>A</i>    | <i>D</i> –H(Å) | H··· <i>A</i> (Å) | <i>D</i> – <i>A</i> (Å) | <i>D</i> –H··· <i>A</i> (°) |
|--------------------|----------------------------|----------------|-------------------|-------------------------|-----------------------------|
| <b>KTS.SA (DH)</b> | N2–H2···O3                 | 0.86           | 1.98              | 2.823(5)                | 164.7                       |
|                    | N3–H3···O5                 | 0.98           | 1.93              | 2.827(5)                | 151.7                       |
|                    | O8–H8a···O4 <sup>2</sup>   | 0.91           | 1.89              | 2.778(1)                | 166.7                       |
|                    | O8–H8b···O2                | 0.94           | 1.87              | 2.799(6)                | 166.8                       |
|                    | O10–H10c···O8              | 0.85           | 2.08              | 2.732(1)                | 133.6                       |
|                    | O10–H10d···O6 <sup>3</sup> | 0.85           | 1.54              | 2.39(2)                 | 179.6                       |
| <b>KTS.SA (MH)</b> | N2–H2···O31                | 0.90(3)        | 1.92(3)           | 2.793(2)                | 165(2)                      |
|                    | O7–H7A···O2                | 0.86(4)        | 1.96(4)           | 2.808(2)                | 168(3)                      |
|                    | O7–H7B···O62               | 0.84(3)        | 2.04(3)           | 2.873(3)                | 171(3)                      |
|                    | N3–H3···O43                | 0.91(3)        | 1.95(3)           | 2.846(2)                | 166(2)                      |
| <b>KTS.MA</b>      | N3–H3···O6                 | 0.94(3)        | 1.93(3)           | 2.774(2)                | 149(2)                      |
|                    | O4–H4A···O6                | 0.82           | 1.61              | 2.426(3)                | 177.9                       |
| <b>KTS.FA</b>      | O5–H5···O6                 | 0.82           | 1.77              | 2.563(2)                | 162.5                       |
|                    | N1–H1···O11                | 0.92(3)        | 1.70              | 2.798(2)                | 155(2)                      |
|                    | N3–H3···O7                 | 0.98           | 1.93(3)           | 2.681(2)                | 174.4                       |

**Table S2:** Hydrogen bond geometry (Å/°) of molecular adducts of KTS.

[Type here]

|                                                                                     | F-H                                                                                 | H-H                                                                                 | H-O                                                                                 | H-C                                                                                   | C-C                                                                                   |
|-------------------------------------------------------------------------------------|-------------------------------------------------------------------------------------|-------------------------------------------------------------------------------------|-------------------------------------------------------------------------------------|---------------------------------------------------------------------------------------|---------------------------------------------------------------------------------------|
| 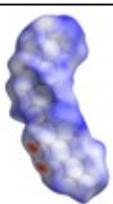   |    |    |    |    |    |
| KTS                                                                                 | 9.6%                                                                                | 45.2%                                                                               | 17%                                                                                 | 17.6%                                                                                 | 3%                                                                                    |
| Total contact population = 92.4%                                                    |                                                                                     |                                                                                     |                                                                                     |                                                                                       |                                                                                       |
|    |    |    |    |    |    |
| KTS-SA-DH                                                                           | 7.4%                                                                                | 39.6%                                                                               | 29.9%                                                                               | 7.1%                                                                                  | 9.3%                                                                                  |
| Total contact population = 93.3%                                                    |                                                                                     |                                                                                     |                                                                                     |                                                                                       |                                                                                       |
|   |   |   |   |   |   |
| KTS-SA-MH                                                                           | 8.2%                                                                                | 40.6%                                                                               | 29.6%                                                                               | 5.6%                                                                                  | 10.8%                                                                                 |
| Total contact population = 94.8%                                                    |                                                                                     |                                                                                     |                                                                                     |                                                                                       |                                                                                       |
|  |  |  |  |  |  |
| KTS-FA                                                                              | 7.3%                                                                                | 37.9%                                                                               | 26.7%                                                                               | 14.2%                                                                                 | 4.7%                                                                                  |
| Total contact population = 90.8%                                                    |                                                                                     |                                                                                     |                                                                                     |                                                                                       |                                                                                       |
|  |  |  |  |  |  |
| KTS-MA                                                                              | 8%                                                                                  | 37%                                                                                 | 27.7%                                                                               | 15.3%                                                                                 | 3.8%                                                                                  |
| Total contact population = 91.8%                                                    |                                                                                     |                                                                                     |                                                                                     |                                                                                       |                                                                                       |

**Table S3:** Hirshfeld Analysis of KTS and its salts

[Type here]

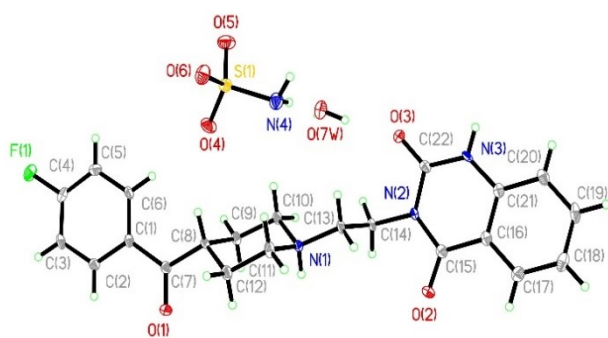

(a)

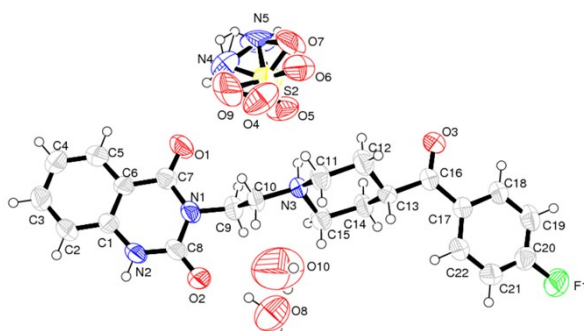

(b)

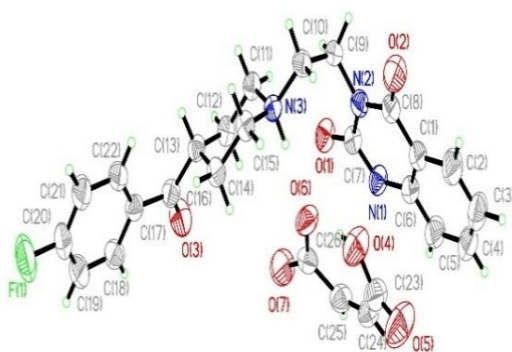

(c)

[Type here]

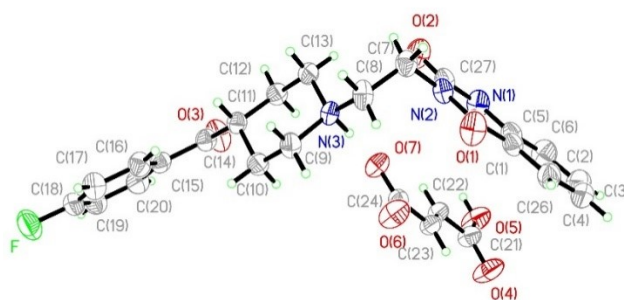

(d)

**Figure S1:** ORTEP view of (a) KTS.SAMH, (b) KTS.SA.DH, (c) KTS.MA (d) KTS.FA salts. Herein, the thermal ellipsoids are drawn with a 50% probability.

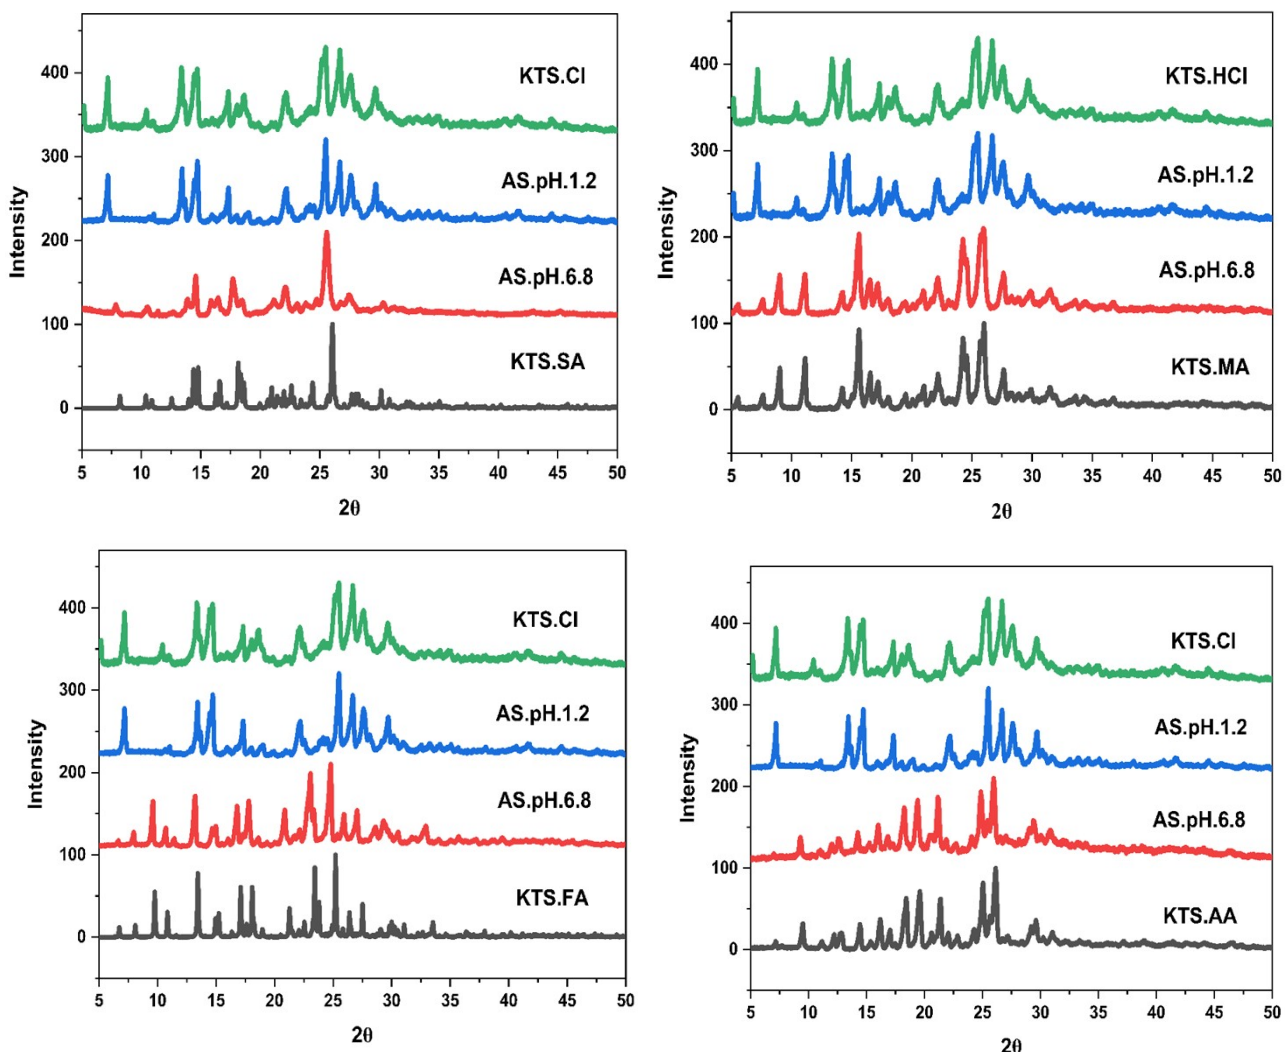

[Type here]

**Figure S2.** PXRD Analysis of all molecular adducts after solubility in both pH 1.2 and 6.8 media

**Solubility studies of KTS and its salts in both pH 1.2 and 6.8 medium:**

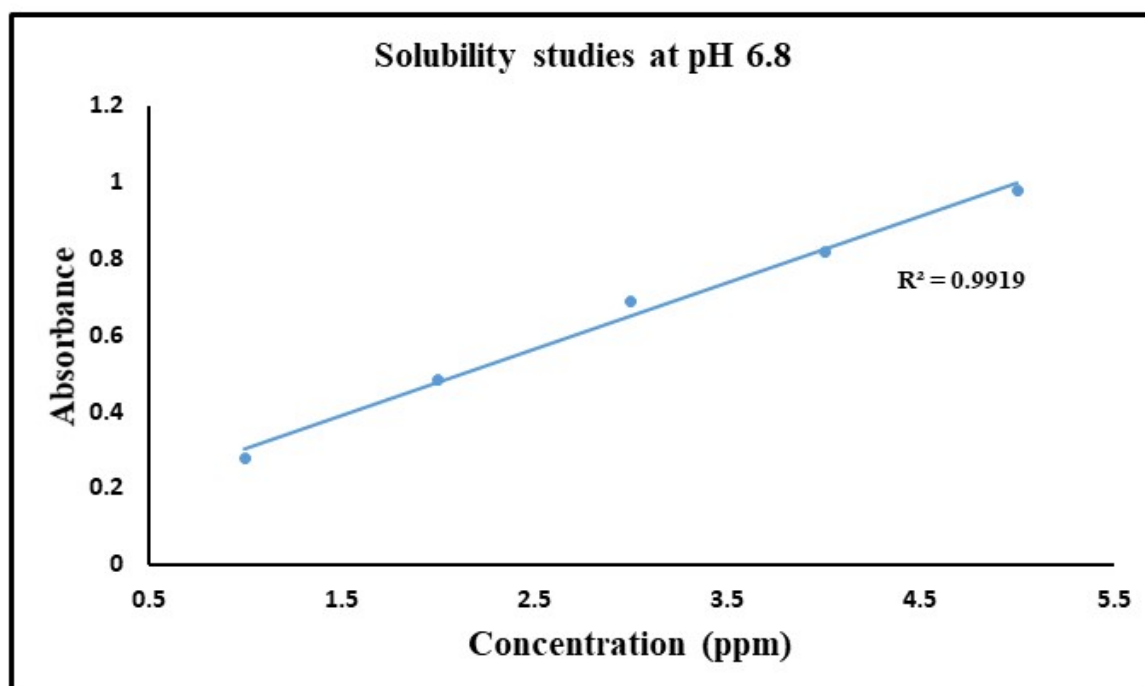



[Type here]

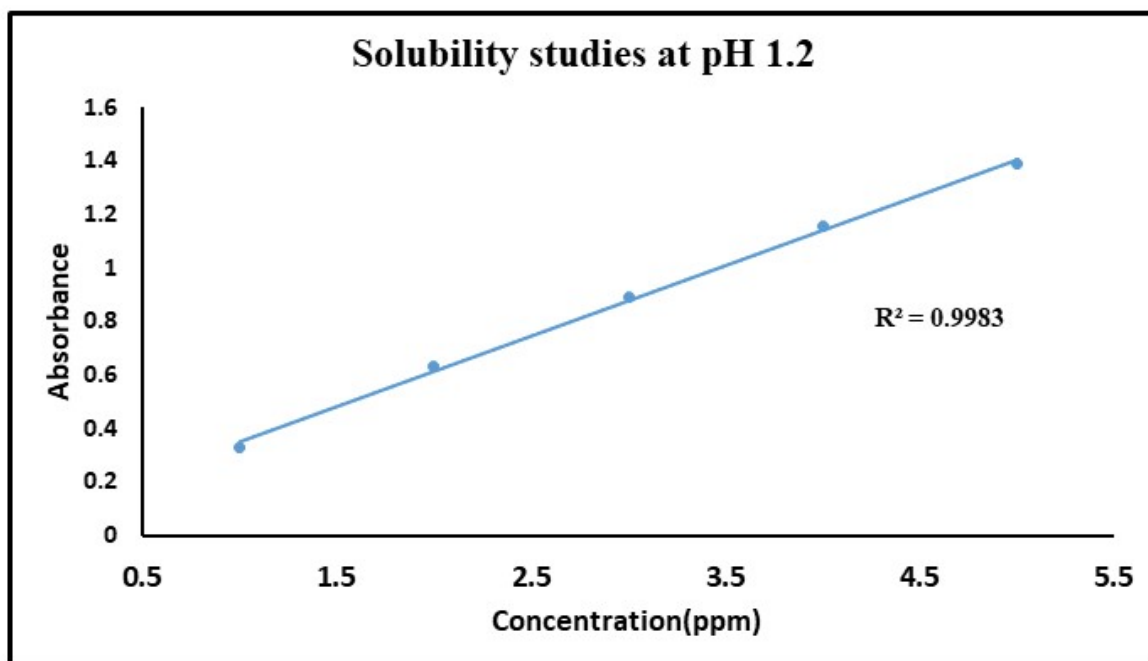

#### Standard Table for KTS in pH 6.8

| ppm | Absorbance |
|-----|------------|
| 1   | 0.278      |
| 2   | 0.482      |
| 3   | 0.688      |
| 4   | 0.82       |
| 5   | 0.978      |

#### Unknown Table of KTS in pH 6.8 after applying dilution factor

| S.No | Sample Name | Absorbance |       |       | Concentration (ppm) |        |        | Standard Deviation | Average Concentration (ppm) | After adding the dilution factor (mg/mL) |
|------|-------------|------------|-------|-------|---------------------|--------|--------|--------------------|-----------------------------|------------------------------------------|
| 1    | KTS.AA      | 0.529      | 0.532 | 0.534 | 2.3140              | 2.3311 | 2.3425 | 0.0144             | 2.3292                      | 2.33                                     |
| 2    | KTS.FA      | 0.74       | 0.743 | 0.739 | 3.5182              | 3.5353 | 3.5125 | 0.0119             | 3.5220                      | 3.52                                     |
| 3    | KTS.MA      | 0.565      | 0.563 | 0.566 | 2.5195              | 2.5080 | 2.5252 | 0.0087             | 2.5176                      | 2.52                                     |
| 4    | KTS.SA      | 0.958      | 0.962 | 0.959 | 4.7624              | 4.7852 | 4.7681 | 0.0119             | 4.7719                      | 15.41                                    |
| 5    | KTS.TA      | 1.027      | 1.024 | 1.019 | 5.1561              | 5.1390 | 5.1105 | 0.0231             | 5.1352                      | 3.59                                     |
| 6    | KTS.HCl     | 0.862      | 0.868 | 0.865 | 4.2145              | 4.2487 | 4.2316 | 0.0171             | 4.2316                      | 4.23                                     |
| 7    | KTS         | 0.372      | 0.379 | 0.375 | 1.4180              | 1.4579 | 1.4351 | 0.0200             | 1.4370                      | 1.44                                     |



[Type here]

**Standard Table for KTS in pH 1.2**

| ppm | Absorbance |
|-----|------------|
| 1   | 0.332      |
| 2   | 0.633      |
| 3   | 0.891      |
| 4   | 1.156      |
| 5   | 1.392      |

**Unknown Table of KTS in pH 1.2 after applying dilution factor**

| S.No | Sample Name | Absorbance |       |       | Concentration (ppm) |        |        | Standard Deviation | Average Concentration (ppm) | After adding the dilution factor (mg/mL) |
|------|-------------|------------|-------|-------|---------------------|--------|--------|--------------------|-----------------------------|------------------------------------------|
| 1    | KTS.AA      | 0.699      | 0.701 | 0.696 | 2.3133              | 2.3209 | 2.3020 | 0.0095             | 2.3121                      | 2.31                                     |
| 2    | KTS.FA      | 0.723      | 0.719 | 0.716 | 2.4040              | 2.3889 | 2.3775 | 0.0132             | 2.3901                      | 2.39                                     |
| 3    | KTS.MA      | 0.899      | 0.901 | 0.907 | 3.0687              | 3.0763 | 3.0990 | 0.0157             | 3.0813                      | 3.08                                     |
| 4    | KTS.SA      | 0.652      | 0.659 | 0.66  | 2.1358              | 2.1622 | 2.1660 | 0.0165             | 2.1547                      | 2.14                                     |
| 5    | KTS.TA      | 0.653      | 0.661 | 0.649 | 2.1396              | 2.1698 | 2.1245 | 0.0231             | 2.1446                      | 3.59                                     |
| 6    | KTS.HCl     | 0.601      | 0.593 | 0.592 | 1.9432              | 1.9130 | 1.9092 | 0.0186             | 1.9218                      | 1.92                                     |
| 7    | KTS         | 0.442      | 0.456 | 0.438 | 1.3426              | 1.3955 | 1.3275 | 0.0357             | 1.3552                      | 1.36                                     |
